# Supplementary material for: Brief Video Intervention to Increase Treatment-Seeking Intention Among U.S. Health Care Workers: A Randomized Controlled Trial
Source: Atypon-hosted journal article supplement (doi:10.1176/appi.ps.20220083), 2022-09-13
Supplement: appi.ps.20220083.ds001.pdf [file appi.ps.20220083.ds001.pdf]

**Study Profile** (August-September 2021)

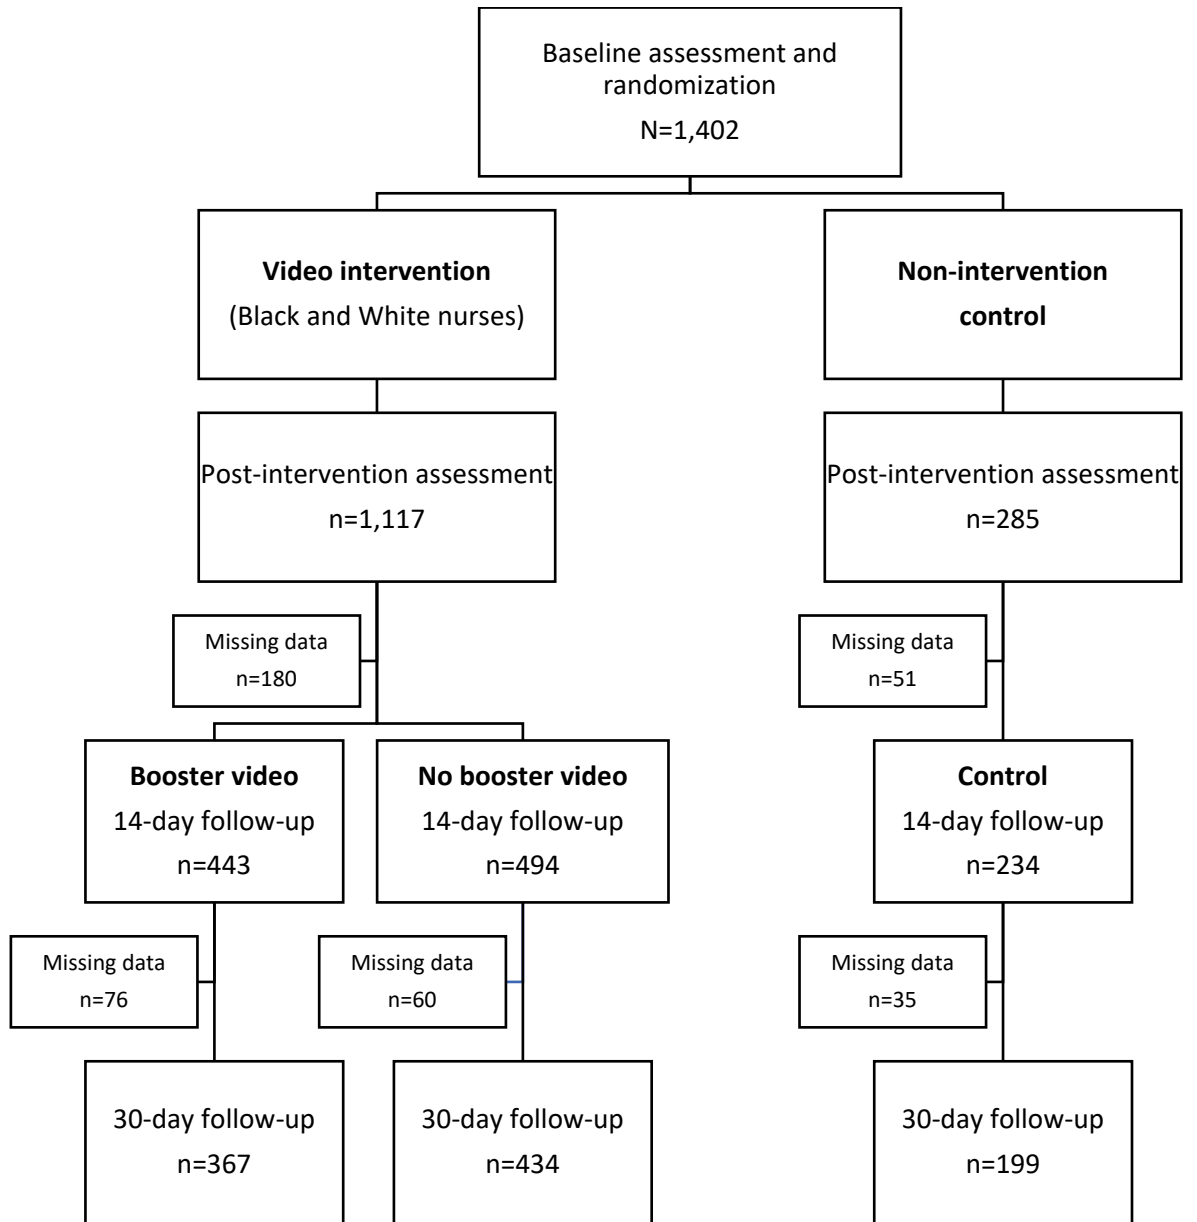

**Links to the video interventions**

1. Black female nurse - <https://youtu.be/Vkp7QHESKk4>
2. White female nurse - <https://youtu.be/myDJIqPrdSo>
